# Supplementary material
Source: PubMed Central journal article supplement (PMC5526637)
Supplement: NIHMS833297-supplement-Online_Appendix_A1.pdf [file NIHMS833297-supplement-Online_Appendix_A1.pdf]

Appendix A1

Table A1.1. General linear model results for Fisher-transformed correlations between true scores and proportion scores.

| Source                                | DF          | SS       | Mean Square | F Value | Pr > F |  |
|---------------------------------------|-------------|----------|-------------|---------|--------|--|
| Model                                 | 107         | 1151.87  | 10.77       | 9139.07 | <.0001 |  |
| Error                                 | 53786       | 63.36    | 0.00        |         |        |  |
| Corrected Total                       | 53893       | 1215.22  |             |         |        |  |
| R-Square                              | Coeff Var   | Root MSE | Mean        |         |        |  |
| 0.947865                              | 2.82689     | 0.03     | 1.21        |         |        |  |
| Proportion of Variation Accounted for |             |          |             |         |        |  |
| Eta-Squared                           | 0.95        |          |             |         |        |  |
| $\omega^2$                            | 0.95        |          |             |         |        |  |
| 95% CI                                | (0.95,0.95) |          |             |         |        |  |

  

| Source         | DF | Type III SS | Mean Square | F Value   | Pr > F | Semi partial Eta-Squared |
|----------------|----|-------------|-------------|-----------|--------|--------------------------|
| SS             | 2  | 0.03        | 0.01        | 11.91     | <.0001 | 0.00                     |
| NI             | 2  | 1009.57     | 504.78      | 428538.00 | <.0001 | 0.83                     |
| IM             | 2  | 123.54      | 61.77       | 52438.70  | <.0001 | 0.10                     |
| DF             | 1  | 1.55        | 1.55        | 1313.22   | <.0001 | 0.00                     |
| PD             | 1  | 6.57        | 6.57        | 5575.44   | <.0001 | 0.01                     |
| SS*NI          | 4  | 0.01        | 0.00        | 1.58      | 0.18   | 0.00                     |
| SS*IM          | 4  | 0.03        | 0.01        | 5.58      | 0.00   | 0.00                     |
| SS*DF          | 2  | 0.00        | 0.00        | 0.74      | 0.48   | 0.00                     |
| SS*PD          | 2  | 0.00        | 0.00        | 0.61      | 0.54   | 0.00                     |
| NI*IM          | 4  | 3.13        | 0.78        | 663.30    | <.0001 | 0.00                     |
| NI*DF          | 2  | 0.55        | 0.27        | 232.48    | <.0001 | 0.00                     |
| NI*PD          | 2  | 3.37        | 1.69        | 1431.70   | <.0001 | 0.00                     |
| IM*DF          | 2  | 0.21        | 0.11        | 90.36     | <.0001 | 0.00                     |
| IM*PD          | 2  | 0.23        | 0.11        | 96.39     | <.0001 | 0.00                     |
| DF*PD          | 1  | 2.26        | 2.26        | 1920.44   | <.0001 | 0.00                     |
| SS*NI*IM       | 8  | 0.01        | 0.00        | 1.18      | 0.30   | 0.00                     |
| SS*NI*DF       | 4  | 0.00        | 0.00        | 0.32      | 0.86   | 0.00                     |
| SS*NI*PD       | 4  | 0.00        | 0.00        | 0.42      | 0.79   | 0.00                     |
| SS*IM*DF       | 4  | 0.00        | 0.00        | 0.10      | 0.98   | 0.00                     |
| SS*IM*PD       | 4  | 0.00        | 0.00        | 0.44      | 0.78   | 0.00                     |
| SS*DF*PD       | 2  | 0.00        | 0.00        | 1.18      | 0.31   | 0.00                     |
| NI*IM*DF       | 4  | 0.03        | 0.01        | 6.69      | <.0001 | 0.00                     |
| NI*IM*PD       | 4  | 0.06        | 0.02        | 13.79     | <.0001 | 0.00                     |
| NI*DF*PD       | 2  | 0.65        | 0.33        | 277.08    | <.0001 | 0.00                     |
| IM*DF*PD       | 2  | 0.01        | 0.01        | 5.72      | 0.00   | 0.00                     |
| SS*NI*IM*DF    | 8  | 0.00        | 0.00        | 0.51      | 0.85   | 0.00                     |
| SS*NI*IM*PD    | 8  | 0.04        | 0.00        | 4.00      | <.0001 | 0.00                     |
| SS*NI*DF*PD    | 4  | 0.01        | 0.00        | 2.44      | 0.04   | 0.00                     |
| SS*IM*DF*PD    | 4  | 0.00        | 0.00        | 0.34      | 0.85   | 0.00                     |
| NI*IM*DF*PD    | 4  | 0.01        | 0.00        | 1.30      | 0.27   | 0.00                     |
| SS*NI*IM*DF*PD | 8  | 0.02        | 0.00        | 1.79      | 0.07   | 0.00                     |

Note: Under "Source," the following abbreviations are used: SS =sample size; NI = number of items; IM = impact condition; DF = DIF magnitude; PD = percent of items with DIF.

Table A1.2. General linear model results for Fisher-transformed correlations between true scores and unconditional scores.

| Source                                | DF          | SS       | Mean Square | F Value  | Pr > F |  |
|---------------------------------------|-------------|----------|-------------|----------|--------|--|
| Model                                 | 107         | 1974.68  | 18.45       | 15009.30 | <.0001 |  |
| Error                                 | 53786       | 66.13    | 0.00        |          |        |  |
| Corrected Total                       | 53893       | 2040.81  |             |          |        |  |
| R-Square                              | Coeff Var   | Root MSE | Mean        |          |        |  |
| 0.967595                              | 2.75742     | 0.04     | 1.27        |          |        |  |
| Proportion of Variation Accounted for |             |          |             |          |        |  |
| Eta-Squared                           | 0.97        |          |             |          |        |  |
| $\omega^2$                            | 0.97        |          |             |          |        |  |
| 95% CI                                | (0.97,0.97) |          |             |          |        |  |

  

| Source         | DF | Type III SS | Mean Square | F Value   | Pr > F | Semipartial Eta-Squared |
|----------------|----|-------------|-------------|-----------|--------|-------------------------|
| SS             | 2  | 0.03        | 0.02        | 13.12     | <.0001 | 0.00                    |
| NI             | 2  | 1710.67     | 855.34      | 695642.00 | <.0001 | 0.84                    |
| IM             | 2  | 214.16      | 107.08      | 87086.80  | <.0001 | 0.10                    |
| DF             | 1  | 9.30        | 9.30        | 7567.57   | <.0001 | 0.00                    |
| PD             | 1  | 15.66       | 15.66       | 12740.20  | <.0001 | 0.01                    |
| SS*NI          | 4  | 0.01        | 0.00        | 2.09      | 0.08   | 0.00                    |
| SS*IM          | 4  | 0.03        | 0.01        | 6.03      | <.0001 | 0.00                    |
| SS*DF          | 2  | 0.00        | 0.00        | 1.12      | 0.33   | 0.00                    |
| SS*PD          | 2  | 0.00        | 0.00        | 0.76      | 0.47   | 0.00                    |
| NI*IM          | 4  | 6.63        | 1.66        | 1348.43   | <.0001 | 0.00                    |
| NI*DF          | 2  | 3.22        | 1.61        | 1310.51   | <.0001 | 0.00                    |
| NI*PD          | 2  | 6.79        | 3.39        | 2759.89   | <.0001 | 0.00                    |
| IM*DF          | 2  | 0.27        | 0.14        | 110.56    | <.0001 | 0.00                    |
| IM*PD          | 2  | 0.12        | 0.06        | 48.02     | <.0001 | 0.00                    |
| DF*PD          | 1  | 6.27        | 6.27        | 5099.53   | <.0001 | 0.00                    |
| SS*NI*IM       | 8  | 0.01        | 0.00        | 0.83      | 0.58   | 0.00                    |
| SS*NI*DF       | 4  | 0.00        | 0.00        | 0.32      | 0.87   | 0.00                    |
| SS*NI*PD       | 4  | 0.00        | 0.00        | 0.82      | 0.51   | 0.00                    |
| SS*IM*DF       | 4  | 0.00        | 0.00        | 0.33      | 0.86   | 0.00                    |
| SS*IM*PD       | 4  | 0.00        | 0.00        | 0.67      | 0.61   | 0.00                    |
| SS*DF*PD       | 2  | 0.00        | 0.00        | 1.38      | 0.25   | 0.00                    |
| NI*IM*DF       | 4  | 0.04        | 0.01        | 8.41      | <.0001 | 0.00                    |
| NI*IM*PD       | 4  | 0.18        | 0.04        | 36.28     | <.0001 | 0.00                    |
| NI*DF*PD       | 2  | 1.40        | 0.70        | 570.25    | <.0001 | 0.00                    |
| IM*DF*PD       | 2  | 0.01        | 0.00        | 3.89      | 0.02   | 0.00                    |
| SS*NI*IM*DF    | 8  | 0.01        | 0.00        | 0.73      | 0.67   | 0.00                    |
| SS*NI*IM*PD    | 8  | 0.04        | 0.01        | 4.11      | <.0001 | 0.00                    |
| SS*NI*DF*PD    | 4  | 0.01        | 0.00        | 2.41      | 0.05   | 0.00                    |
| SS*IM*DF*PD    | 4  | 0.00        | 0.00        | 0.35      | 0.84   | 0.00                    |
| NI*IM*DF*PD    | 4  | 0.03        | 0.01        | 6.79      | <.0001 | 0.00                    |
| SS*NI*IM*DF*PD | 8  | 0.01        | 0.00        | 1.52      | 0.14   | 0.00                    |

Note: Under "Source," the following abbreviations are used: SS =sample size; NI = number of items; IM = impact condition; DF = DIF magnitude; PD = percent of items with DIF.

Table A1.3. General linear model results for Fisher-transformed correlations between true scores and impact-only scores.

| Source                                | DF          | SS       | Mean Square | F Value  | Pr > F |  |
|---------------------------------------|-------------|----------|-------------|----------|--------|--|
| Model                                 | 107         | 1718.23  | 16.06       | 10212.10 | <.0001 |  |
| Error                                 | 53786       | 84.58    | 0.00        |          |        |  |
| Corrected Total                       | 53893       | 1802.81  |             |          |        |  |
| R-Square                              | Coeff Var   | Root MSE | Mean        |          |        |  |
| 0.953086                              | 2.94758     | 0.04     | 1.35        |          |        |  |
| Proportion of Variation Accounted for |             |          |             |          |        |  |
| Eta-Squared                           | 0.95        |          |             |          |        |  |
| $\omega^2$                            | 0.95        |          |             |          |        |  |
| 95% CI                                | (0.95,0.95) |          |             |          |        |  |

  

| Source         | DF | Type III SS | Mean Square | F Value   | Pr > F | Semipartial Eta-Squared |
|----------------|----|-------------|-------------|-----------|--------|-------------------------|
| SS             | 2  | 1.18        | 0.59        | 375.29    | <.0001 | 0.00                    |
| NI             | 2  | 1441.87     | 720.93      | 458471.00 | <.0001 | 0.80                    |
| IM             | 2  | 30.24       | 15.12       | 9616.31   | <.0001 | 0.02                    |
| DF             | 1  | 84.68       | 84.68       | 53850.60  | <.0001 | 0.05                    |
| PD             | 1  | 122.57      | 122.57      | 77947.70  | <.0001 | 0.07                    |
| SS*NI          | 4  | 0.17        | 0.04        | 27.64     | <.0001 | 0.00                    |
| SS*IM          | 4  | 0.01        | 0.00        | 1.56      | 0.18   | 0.00                    |
| SS*DF          | 2  | 0.01        | 0.00        | 2.78      | 0.06   | 0.00                    |
| SS*PD          | 2  | 0.00        | 0.00        | 1.52      | 0.22   | 0.00                    |
| NI*IM          | 4  | 0.67        | 0.17        | 106.77    | <.0001 | 0.00                    |
| NI*DF          | 2  | 2.96        | 1.48        | 939.80    | <.0001 | 0.00                    |
| NI*PD          | 2  | 1.84        | 0.92        | 585.10    | <.0001 | 0.00                    |
| IM*DF          | 2  | 0.10        | 0.05        | 32.69     | <.0001 | 0.00                    |
| IM*PD          | 2  | 0.00        | 0.00        | 0.46      | 0.63   | 0.00                    |
| DF*PD          | 1  | 33.87       | 33.87       | 21539.20  | <.0001 | 0.02                    |
| SS*NI*IM       | 8  | 0.01        | 0.00        | 0.48      | 0.87   | 0.00                    |
| SS*NI*DF       | 4  | 0.00        | 0.00        | 0.07      | 0.99   | 0.00                    |
| SS*NI*PD       | 4  | 0.02        | 0.01        | 3.53      | 0.01   | 0.00                    |
| SS*IM*DF       | 4  | 0.01        | 0.00        | 0.82      | 0.51   | 0.00                    |
| SS*IM*PD       | 4  | 0.01        | 0.00        | 1.08      | 0.36   | 0.00                    |
| SS*DF*PD       | 2  | 0.01        | 0.00        | 3.16      | 0.04   | 0.00                    |
| NI*IM*DF       | 4  | 0.02        | 0.01        | 3.84      | 0.00   | 0.00                    |
| NI*IM*PD       | 4  | 0.01        | 0.00        | 1.24      | 0.29   | 0.00                    |
| NI*DF*PD       | 2  | 0.29        | 0.14        | 91.26     | <.0001 | 0.00                    |
| IM*DF*PD       | 2  | 0.02        | 0.01        | 5.06      | 0.01   | 0.00                    |
| SS*NI*IM*DF    | 8  | 0.02        | 0.00        | 1.75      | 0.08   | 0.00                    |
| SS*NI*IM*PD    | 8  | 0.03        | 0.00        | 2.37      | 0.02   | 0.00                    |
| SS*NI*DF*PD    | 4  | 0.02        | 0.00        | 2.63      | 0.03   | 0.00                    |
| SS*IM*DF*PD    | 4  | 0.01        | 0.00        | 1.02      | 0.39   | 0.00                    |
| NI*IM*DF*PD    | 4  | 0.01        | 0.00        | 1.22      | 0.30   | 0.00                    |
| SS*NI*IM*DF*PD | 8  | 0.02        | 0.00        | 1.29      | 0.24   | 0.00                    |

Note: Under "Source," the following abbreviations are used: SS =sample size; NI = number of items; IM = impact condition; DF = DIF magnitude; PD = percent of items with DIF.

Table A1.4. General linear model results for Fisher-transformed correlations between true scores and impact-and-DIF scores.

| Source                                       | DF          | SS       | Mean Square | F Value  | Pr > F |  |
|----------------------------------------------|-------------|----------|-------------|----------|--------|--|
| Model                                        | 107         | 1825.24  | 17.06       | 10847.40 | <.0001 |  |
| Error                                        | 53786       | 84.58    | 0.00        |          |        |  |
| Corrected Total                              | 53893       | 1909.82  |             |          |        |  |
| R-Square                                     | Coeff Var   | Root MSE | Mean        |          |        |  |
| 0.955712                                     | 2.80684     | 0.04     | 1.41        |          |        |  |
| <b>Proportion of Variation Accounted for</b> |             |          |             |          |        |  |
| Eta-Squared                                  | 0.96        |          |             |          |        |  |
| $\omega^2$                                   | 0.96        |          |             |          |        |  |
| 95% CI                                       | (0.96,0.96) |          |             |          |        |  |

  

| Source         | DF | Type III SS | Mean Square | F Value   | Pr > F | Semipartial Eta-Squared |
|----------------|----|-------------|-------------|-----------|--------|-------------------------|
| SS             | 2  | 6.20        | 3.10        | 1970.79   | <.0001 | 0.00                    |
| NI             | 2  | 1787.52     | 893.76      | 568340.00 | <.0001 | 0.94                    |
| IM             | 2  | 27.67       | 13.84       | 8797.69   | <.0001 | 0.01                    |
| DF             | 1  | 0.14        | 0.14        | 89.27     | <.0001 | 0.00                    |
| PD             | 1  | 2.70        | 2.70        | 1714.09   | <.0001 | 0.00                    |
| SS*NI          | 4  | 0.37        | 0.09        | 58.44     | <.0001 | 0.00                    |
| SS*IM          | 4  | 0.03        | 0.01        | 4.31      | 0.00   | 0.00                    |
| SS*DF          | 2  | 0.00        | 0.00        | 1.13      | 0.32   | 0.00                    |
| SS*PD          | 2  | 0.48        | 0.24        | 152.12    | <.0001 | 0.00                    |
| NI*IM          | 4  | 0.82        | 0.20        | 129.74    | <.0001 | 0.00                    |
| NI*DF          | 2  | 0.00        | 0.00        | 1.08      | 0.34   | 0.00                    |
| NI*PD          | 2  | 0.10        | 0.05        | 31.66     | <.0001 | 0.00                    |
| IM*DF          | 2  | 0.39        | 0.20        | 124.31    | <.0001 | 0.00                    |
| IM*PD          | 2  | 0.09        | 0.05        | 30.08     | <.0001 | 0.00                    |
| DF*PD          | 1  | 0.03        | 0.03        | 21.96     | <.0001 | 0.00                    |
| SS*NI*IM       | 8  | 0.01        | 0.00        | 0.93      | 0.49   | 0.00                    |
| SS*NI*DF       | 4  | 0.00        | 0.00        | 0.48      | 0.75   | 0.00                    |
| SS*NI*PD       | 4  | 0.02        | 0.00        | 3.13      | 0.01   | 0.00                    |
| SS*IM*DF       | 4  | 0.00        | 0.00        | 0.30      | 0.88   | 0.00                    |
| SS*IM*PD       | 4  | 0.03        | 0.01        | 5.34      | 0.00   | 0.00                    |
| SS*DF*PD       | 2  | 0.00        | 0.00        | 1.09      | 0.34   | 0.00                    |
| NI*IM*DF       | 4  | 0.00        | 0.00        | 0.55      | 0.70   | 0.00                    |
| NI*IM*PD       | 4  | 0.02        | 0.00        | 2.43      | 0.05   | 0.00                    |
| NI*DF*PD       | 2  | 0.01        | 0.01        | 4.54      | 0.01   | 0.00                    |
| IM*DF*PD       | 2  | 0.02        | 0.01        | 5.66      | 0.00   | 0.00                    |
| SS*NI*IM*DF    | 8  | 0.02        | 0.00        | 1.46      | 0.16   | 0.00                    |
| SS*NI*IM*PD    | 8  | 0.03        | 0.00        | 2.74      | 0.01   | 0.00                    |
| SS*NI*DF*PD    | 4  | 0.01        | 0.00        | 1.27      | 0.28   | 0.00                    |
| SS*IM*DF*PD    | 4  | 0.01        | 0.00        | 0.84      | 0.50   | 0.00                    |
| NI*IM*DF*PD    | 4  | 0.01        | 0.00        | 1.12      | 0.35   | 0.00                    |
| SS*NI*IM*DF*PD | 8  | 0.02        | 0.00        | 1.33      | 0.22   | 0.00                    |

Note: Under "Source," the following abbreviations are used: SS =sample size; NI = number of items; IM = impact condition; DF = DIF magnitude; PD = percent of items with DIF.
