# Supplementary material
Source: PubMed Central journal article supplement (PMC5526637)
Supplement: NIHMS833297-supplement-Online_Appendix_A2.pdf [file NIHMS833297-supplement-Online_Appendix_A2.pdf]

Appendix A2

Table A2.1 Average correlations between true and estimated scores across all scoring models and design factors at N = 1000.

| 6 Items                            | Proportion Score |       | Unconditional Score |       | Impact-Only Score |       | Impact-and-DIF Score |       |
|------------------------------------|------------------|-------|---------------------|-------|-------------------|-------|----------------------|-------|
|                                    | Mean             | SD    | Mean                | SD    | Mean              | SD    | Mean                 | SD    |
| <i>Small Mean/Large Variance</i>   |                  |       |                     |       |                   |       |                      |       |
| 33% Small DIF                      | 0.757            | 0.015 | 0.759               | 0.014 | 0.826             | 0.013 | 0.826                | 0.013 |
| 66% Small DIF                      | 0.755            | 0.014 | 0.757               | 0.014 | 0.813             | 0.013 | 0.822                | 0.013 |
| 33% Large DIF                      | 0.757            | 0.014 | 0.759               | 0.013 | 0.823             | 0.013 | 0.829                | 0.012 |
| 66% Large DIF                      | 0.751            | 0.014 | 0.747               | 0.015 | 0.773             | 0.019 | 0.826                | 0.013 |
| <i>Medium Mean/Medium Variance</i> |                  |       |                     |       |                   |       |                      |       |
| 33% Small DIF                      | 0.785            | 0.012 | 0.792               | 0.012 | 0.828             | 0.011 | 0.829                | 0.011 |
| 66% Small DIF                      | 0.786            | 0.011 | 0.793               | 0.011 | 0.815             | 0.012 | 0.824                | 0.011 |
| 33% Large DIF                      | 0.785            | 0.012 | 0.792               | 0.012 | 0.825             | 0.011 | 0.830                | 0.011 |
| 66% Large DIF                      | 0.782            | 0.011 | 0.784               | 0.011 | 0.773             | 0.017 | 0.824                | 0.011 |
| <i>Large Mean/Small Variance</i>   |                  |       |                     |       |                   |       |                      |       |
| 33% Small DIF                      | 0.789            | 0.011 | 0.800               | 0.010 | 0.845             | 0.009 | 0.846                | 0.009 |
| 66% Small DIF                      | 0.792            | 0.011 | 0.803               | 0.010 | 0.833             | 0.010 | 0.841                | 0.010 |
| 33% Large DIF                      | 0.790            | 0.010 | 0.801               | 0.010 | 0.839             | 0.009 | 0.845                | 0.009 |
| 66% Large DIF                      | 0.791            | 0.010 | 0.798               | 0.011 | 0.794             | 0.015 | 0.839                | 0.010 |
| <hr/>                              |                  |       |                     |       |                   |       |                      |       |
| 12 Items                           | Proportion Score |       | Unconditional Score |       | Impact-Only Score |       | Impact-and-DIF Score |       |
|                                    | Mean             | SD    | Mean                | SD    | Mean              | SD    | Mean                 | SD    |
| <i>Small Mean/Large Variance</i>   |                  |       |                     |       |                   |       |                      |       |
| 33% Small DIF                      | 0.825            | 0.012 | 0.834               | 0.011 | 0.880             | 0.009 | 0.882                | 0.009 |
| 66% Small DIF                      | 0.821            | 0.011 | 0.830               | 0.011 | 0.871             | 0.010 | 0.881                | 0.009 |
| 33% Large DIF                      | 0.825            | 0.013 | 0.831               | 0.012 | 0.873             | 0.010 | 0.885                | 0.009 |
| 66% Large DIF                      | 0.811            | 0.011 | 0.815               | 0.011 | 0.838             | 0.012 | 0.884                | 0.009 |
| <i>Medium Mean/Medium Variance</i> |                  |       |                     |       |                   |       |                      |       |
| 33% Small DIF                      | 0.851            | 0.008 | 0.864               | 0.008 | 0.883             | 0.007 | 0.886                | 0.007 |
| 66% Small DIF                      | 0.848            | 0.009 | 0.861               | 0.008 | 0.874             | 0.008 | 0.884                | 0.008 |
| 33% Large DIF                      | 0.851            | 0.008 | 0.863               | 0.008 | 0.876             | 0.008 | 0.886                | 0.007 |
| 66% Large DIF                      | 0.841            | 0.009 | 0.850               | 0.009 | 0.842             | 0.011 | 0.884                | 0.007 |
| <i>Large Mean/Small Variance</i>   |                  |       |                     |       |                   |       |                      |       |
| 33% Small DIF                      | 0.856            | 0.007 | 0.874               | 0.007 | 0.893             | 0.006 | 0.895                | 0.006 |
| 66% Small DIF                      | 0.853            | 0.007 | 0.871               | 0.007 | 0.884             | 0.007 | 0.892                | 0.007 |
| 33% Large DIF                      | 0.858            | 0.007 | 0.875               | 0.007 | 0.885             | 0.007 | 0.895                | 0.006 |
| 66% Large DIF                      | 0.849            | 0.008 | 0.863               | 0.008 | 0.853             | 0.009 | 0.891                | 0.007 |
| <hr/>                              |                  |       |                     |       |                   |       |                      |       |
| 24 Items                           | Proportion Score |       | Unconditional Score |       | Impact-Only Score |       | Impact-and-DIF Score |       |
|                                    | Mean             | SD    | Mean                | SD    | Mean              | SD    | Mean                 | SD    |
| <i>Small Mean/Large Variance</i>   |                  |       |                     |       |                   |       |                      |       |
| 33% Small DIF                      | 0.866            | 0.010 | 0.892               | 0.008 | 0.921             | 0.006 | 0.924                | 0.006 |
| 66% Small DIF                      | 0.860            | 0.011 | 0.885               | 0.009 | 0.913             | 0.007 | 0.923                | 0.006 |
| 33% Large DIF                      | 0.865            | 0.010 | 0.887               | 0.009 | 0.915             | 0.007 | 0.925                | 0.006 |
| 66% Large DIF                      | 0.848            | 0.011 | 0.865               | 0.009 | 0.883             | 0.009 | 0.924                | 0.006 |
| <i>Medium Mean/Medium Variance</i> |                  |       |                     |       |                   |       |                      |       |
| 33% Small DIF                      | 0.890            | 0.006 | 0.914               | 0.005 | 0.925             | 0.005 | 0.927                | 0.005 |
| 66% Small DIF                      | 0.886            | 0.007 | 0.910               | 0.006 | 0.916             | 0.006 | 0.926                | 0.005 |
| 33% Large DIF                      | 0.890            | 0.007 | 0.912               | 0.006 | 0.918             | 0.006 | 0.928                | 0.005 |
| 66% Large DIF                      | 0.876            | 0.007 | 0.894               | 0.007 | 0.888             | 0.007 | 0.926                | 0.005 |
| <i>Large Mean/Small Variance</i>   |                  |       |                     |       |                   |       |                      |       |
| 33% Small DIF                      | 0.894            | 0.005 | 0.922               | 0.004 | 0.930             | 0.004 | 0.932                | 0.004 |
| 66% Small DIF                      | 0.891            | 0.006 | 0.918               | 0.005 | 0.921             | 0.005 | 0.930                | 0.004 |
| 33% Large DIF                      | 0.895            | 0.006 | 0.921               | 0.005 | 0.923             | 0.005 | 0.932                | 0.004 |
| 66% Large DIF                      | 0.884            | 0.006 | 0.905               | 0.005 | 0.894             | 0.006 | 0.930                | 0.004 |

Table A2.2 Average correlations between true and estimated scores across all scoring models and design factors at N = 2000.

| 6 Items                            | Proportion Score |       | Unconditional Score |       | Impact-Only Score |       | Impact-and-DIF Score |       |
|------------------------------------|------------------|-------|---------------------|-------|-------------------|-------|----------------------|-------|
|                                    | Mean             | SD    | Mean                | SD    | Mean              | SD    | Mean                 | SD    |
| <i>Small Mean/Large Variance</i>   |                  |       |                     |       |                   |       |                      |       |
| 33% Small DIF                      | 0.757            | 0.010 | 0.759               | 0.010 | 0.827             | 0.009 | 0.829                | 0.008 |
| 66% Small DIF                      | 0.756            | 0.010 | 0.758               | 0.010 | 0.816             | 0.010 | 0.828                | 0.009 |
| 33% Large DIF                      | 0.758            | 0.010 | 0.760               | 0.010 | 0.826             | 0.009 | 0.833                | 0.009 |
| 66% Large DIF                      | 0.750            | 0.010 | 0.746               | 0.010 | 0.774             | 0.014 | 0.830                | 0.008 |
| <i>Medium Mean/Medium Variance</i> |                  |       |                     |       |                   |       |                      |       |
| 33% Small DIF                      | 0.785            | 0.008 | 0.793               | 0.008 | 0.830             | 0.008 | 0.831                | 0.007 |
| 66% Small DIF                      | 0.787            | 0.008 | 0.794               | 0.008 | 0.818             | 0.008 | 0.829                | 0.008 |
| 33% Large DIF                      | 0.787            | 0.008 | 0.794               | 0.008 | 0.827             | 0.008 | 0.834                | 0.007 |
| 66% Large DIF                      | 0.782            | 0.008 | 0.785               | 0.008 | 0.776             | 0.012 | 0.829                | 0.007 |
| <i>Large Mean/Small Variance</i>   |                  |       |                     |       |                   |       |                      |       |
| 33% Small DIF                      | 0.789            | 0.007 | 0.800               | 0.007 | 0.846             | 0.006 | 0.848                | 0.006 |
| 66% Small DIF                      | 0.793            | 0.007 | 0.805               | 0.007 | 0.835             | 0.007 | 0.845                | 0.006 |
| 33% Large DIF                      | 0.790            | 0.008 | 0.801               | 0.007 | 0.842             | 0.007 | 0.848                | 0.006 |
| 66% Large DIF                      | 0.792            | 0.007 | 0.799               | 0.008 | 0.796             | 0.011 | 0.843                | 0.007 |
| <hr/>                              |                  |       |                     |       |                   |       |                      |       |
| 12 Items                           | Proportion Score |       | Unconditional Score |       | Impact-Only Score |       | Impact-and-DIF Score |       |
|                                    | Mean             | SD    | Mean                | SD    | Mean              | SD    | Mean                 | SD    |
| <i>Small Mean/Large Variance</i>   |                  |       |                     |       |                   |       |                      |       |
| 33% Small DIF                      | 0.824            | 0.008 | 0.834               | 0.008 | 0.881             | 0.006 | 0.884                | 0.006 |
| 66% Small DIF                      | 0.821            | 0.009 | 0.830               | 0.008 | 0.872             | 0.007 | 0.884                | 0.006 |
| 33% Large DIF                      | 0.825            | 0.009 | 0.831               | 0.008 | 0.874             | 0.007 | 0.886                | 0.006 |
| 66% Large DIF                      | 0.811            | 0.008 | 0.815               | 0.008 | 0.839             | 0.009 | 0.886                | 0.006 |
| <i>Medium Mean/Medium Variance</i> |                  |       |                     |       |                   |       |                      |       |
| 33% Small DIF                      | 0.851            | 0.006 | 0.864               | 0.006 | 0.884             | 0.005 | 0.887                | 0.005 |
| 66% Small DIF                      | 0.848            | 0.006 | 0.861               | 0.005 | 0.875             | 0.006 | 0.886                | 0.005 |
| 33% Large DIF                      | 0.852            | 0.006 | 0.863               | 0.006 | 0.877             | 0.006 | 0.888                | 0.005 |
| 66% Large DIF                      | 0.841            | 0.006 | 0.850               | 0.006 | 0.843             | 0.008 | 0.886                | 0.005 |
| <i>Large Mean/Small Variance</i>   |                  |       |                     |       |                   |       |                      |       |
| 33% Small DIF                      | 0.856            | 0.005 | 0.874               | 0.005 | 0.894             | 0.005 | 0.896                | 0.005 |
| 66% Small DIF                      | 0.854            | 0.005 | 0.872               | 0.005 | 0.884             | 0.005 | 0.894                | 0.004 |
| 33% Large DIF                      | 0.858            | 0.005 | 0.875               | 0.005 | 0.886             | 0.005 | 0.896                | 0.004 |
| 66% Large DIF                      | 0.849            | 0.006 | 0.864               | 0.006 | 0.854             | 0.007 | 0.893                | 0.005 |
| <hr/>                              |                  |       |                     |       |                   |       |                      |       |
| 24 Items                           | Proportion Score |       | Unconditional Score |       | Impact-Only Score |       | Impact-and-DIF Score |       |
|                                    | Mean             | SD    | Mean                | SD    | Mean              | SD    | Mean                 | SD    |
| <i>Small Mean/Large Variance</i>   |                  |       |                     |       |                   |       |                      |       |
| 33% Small DIF                      | 0.866            | 0.007 | 0.891               | 0.006 | 0.922             | 0.004 | 0.925                | 0.004 |
| 66% Small DIF                      | 0.860            | 0.008 | 0.885               | 0.007 | 0.913             | 0.005 | 0.924                | 0.004 |
| 33% Large DIF                      | 0.865            | 0.007 | 0.887               | 0.006 | 0.915             | 0.005 | 0.926                | 0.004 |
| 66% Large DIF                      | 0.848            | 0.007 | 0.866               | 0.007 | 0.884             | 0.006 | 0.926                | 0.004 |
| <i>Medium Mean/Medium Variance</i> |                  |       |                     |       |                   |       |                      |       |
| 33% Small DIF                      | 0.889            | 0.005 | 0.914               | 0.004 | 0.925             | 0.004 | 0.928                | 0.004 |
| 66% Small DIF                      | 0.886            | 0.005 | 0.910               | 0.004 | 0.917             | 0.004 | 0.927                | 0.004 |
| 33% Large DIF                      | 0.890            | 0.005 | 0.912               | 0.004 | 0.918             | 0.004 | 0.929                | 0.003 |
| 66% Large DIF                      | 0.876            | 0.005 | 0.893               | 0.005 | 0.888             | 0.005 | 0.927                | 0.004 |
| <i>Large Mean/Small Variance</i>   |                  |       |                     |       |                   |       |                      |       |
| 33% Small DIF                      | 0.894            | 0.004 | 0.922               | 0.003 | 0.930             | 0.003 | 0.933                | 0.003 |
| 66% Small DIF                      | 0.890            | 0.004 | 0.918               | 0.003 | 0.922             | 0.003 | 0.931                | 0.003 |
| 33% Large DIF                      | 0.896            | 0.004 | 0.922               | 0.003 | 0.924             | 0.003 | 0.933                | 0.003 |
| 66% Large DIF                      | 0.884            | 0.004 | 0.905               | 0.004 | 0.895             | 0.005 | 0.931                | 0.003 |
