# Supplementary material
Source: PubMed Central journal article supplement (PMC5526637)
Supplement: NIHMS833297-supplement-Online_Appendix_A3.pdf [file NIHMS833297-supplement-Online_Appendix_A3.pdf]

Appendix A3

Table A3.1. General linear model results for RMSE under the unconditional model.

| Source                                       | DF          | SS       | Mean Square | F Value | Pr > F |  |
|----------------------------------------------|-------------|----------|-------------|---------|--------|--|
| Model                                        | 107         | 374.68   | 3.50        | 8573.07 | <.0001 |  |
| Error                                        | 53786       | 21.97    | 0.00        |         |        |  |
| Corrected Total                              | 53893       | 396.65   |             |         |        |  |
| R-Square                                     | Coeff Var   | Root MSE | Mean        |         |        |  |
| 0.944614                                     | 3.84876     | 0.02     | 0.53        |         |        |  |
| <b>Proportion of Variation Accounted for</b> |             |          |             |         |        |  |
| Eta-Squared                                  | 0.94        |          |             |         |        |  |
| $\omega^2$                                   | 0.94        |          |             |         |        |  |
| 95% CI                                       | (0.94,0.95) |          |             |         |        |  |

  

| Source         | DF | Type III SS | Mean Square | F Value   | Pr > F | Semipartial Eta-Squared |
|----------------|----|-------------|-------------|-----------|--------|-------------------------|
| SS             | 2  | 0.05        | 0.03        | 66.23     | <.0001 | 0.00                    |
| NI             | 2  | 324.96      | 162.48      | 397799.00 | <.0001 | 0.82                    |
| IM             | 2  | 41.83       | 20.92       | 51211.10  | <.0001 | 0.11                    |
| DF             | 1  | 1.74        | 1.74        | 4264.15   | <.0001 | 0.00                    |
| PD             | 1  | 2.73        | 2.73        | 6695.68   | <.0001 | 0.01                    |
| SS*NI          | 4  | 0.00        | 0.00        | 0.42      | 0.80   | 0.00                    |
| SS*IM          | 4  | 0.00        | 0.00        | 0.75      | 0.56   | 0.00                    |
| SS*DF          | 2  | 0.00        | 0.00        | 0.64      | 0.53   | 0.00                    |
| SS*PD          | 2  | 0.00        | 0.00        | 1.48      | 0.23   | 0.00                    |
| NI*IM          | 4  | 0.47        | 0.12        | 286.17    | <.0001 | 0.00                    |
| NI*DF          | 2  | 0.49        | 0.25        | 602.99    | <.0001 | 0.00                    |
| NI*PD          | 2  | 0.92        | 0.46        | 1126.22   | <.0001 | 0.00                    |
| IM*DF          | 2  | 0.10        | 0.05        | 117.13    | <.0001 | 0.00                    |
| IM*PD          | 2  | 0.06        | 0.03        | 69.85     | <.0001 | 0.00                    |
| DF*PD          | 1  | 1.14        | 1.14        | 2799.16   | <.0001 | 0.00                    |
| SS*NI*IM       | 8  | 0.01        | 0.00        | 1.63      | 0.11   | 0.00                    |
| SS*NI*DF       | 4  | 0.00        | 0.00        | 0.90      | 0.46   | 0.00                    |
| SS*NI*PD       | 4  | 0.00        | 0.00        | 0.19      | 0.94   | 0.00                    |
| SS*IM*DF       | 4  | 0.00        | 0.00        | 1.73      | 0.14   | 0.00                    |
| SS*IM*PD       | 4  | 0.00        | 0.00        | 2.32      | 0.05   | 0.00                    |
| SS*DF*PD       | 2  | 0.00        | 0.00        | 1.11      | 0.33   | 0.00                    |
| NI*IM*DF       | 4  | 0.01        | 0.00        | 7.96      | <.0001 | 0.00                    |
| NI*IM*PD       | 4  | 0.03        | 0.01        | 15.88     | <.0001 | 0.00                    |
| NI*DF*PD       | 2  | 0.20        | 0.10        | 248.13    | <.0001 | 0.00                    |
| IM*DF*PD       | 2  | 0.00        | 0.00        | 4.92      | 0.01   | 0.00                    |
| SS*NI*IM*DF    | 8  | 0.00        | 0.00        | 0.52      | 0.84   | 0.00                    |
| SS*NI*IM*PD    | 8  | 0.00        | 0.00        | 1.04      | 0.41   | 0.00                    |
| SS*NI*DF*PD    | 4  | 0.00        | 0.00        | 1.51      | 0.20   | 0.00                    |
| SS*IM*DF*PD    | 4  | 0.00        | 0.00        | 0.70      | 0.59   | 0.00                    |
| NI*IM*DF*PD    | 4  | 0.00        | 0.00        | 1.18      | 0.32   | 0.00                    |
| SS*NI*IM*DF*PD | 8  | 0.00        | 0.00        | 0.53      | 0.83   | 0.00                    |

Note: Under "Source," the following abbreviations are used: SS =sample size; NI = number of items; IM = impact condition; DF = DIF magnitude; PD = percent of items with DIF.

Table A3.2. General linear model results for RMSE under the impact-only model.

| Source                                       | DF          | SS       | Mean Square | F Value | Pr > F |  |
|----------------------------------------------|-------------|----------|-------------|---------|--------|--|
| Model                                        | 107         | 407.27   | 3.81        | 5419.33 | <.0001 |  |
| Error                                        | 53786       | 37.78    | 0.00        |         |        |  |
| Corrected Total                              | 53893       | 445.05   |             |         |        |  |
| R-Square                                     | Coeff Var   | Root MSE | Mean        |         |        |  |
| 0.915118                                     | 5.197       | 0.03     | 0.51        |         |        |  |
| <b>Proportion of Variation Accounted for</b> |             |          |             |         |        |  |
| Eta-Squared                                  | 0.92        |          |             |         |        |  |
| $\omega^2$                                   | 0.91        |          |             |         |        |  |
| 95% CI                                       | (0.91,0.92) |          |             |         |        |  |

  

| Source         | DF | Type III SS | Mean Square | F Value   | Pr > F | Semipartial Eta-Squared |
|----------------|----|-------------|-------------|-----------|--------|-------------------------|
| SS             | 2  | 2.25        | 1.12        | 1600.43   | <.0001 | 0.01                    |
| NI             | 2  | 284.29      | 142.14      | 202384.00 | <.0001 | 0.64                    |
| IM             | 2  | 4.19        | 2.10        | 2984.11   | <.0001 | 0.01                    |
| DF             | 1  | 40.75       | 40.75       | 58023.30  | <.0001 | 0.09                    |
| PD             | 1  | 54.05       | 54.05       | 76951.70  | <.0001 | 0.12                    |
| SS*NI          | 4  | 0.40        | 0.10        | 141.69    | <.0001 | 0.00                    |
| SS*IM          | 4  | 0.09        | 0.02        | 30.48     | <.0001 | 0.00                    |
| SS*DF          | 2  | 0.08        | 0.04        | 56.16     | <.0001 | 0.00                    |
| SS*PD          | 2  | 0.06        | 0.03        | 44.97     | <.0001 | 0.00                    |
| NI*IM          | 4  | 0.56        | 0.14        | 199.17    | <.0001 | 0.00                    |
| NI*DF          | 2  | 0.04        | 0.02        | 27.84     | <.0001 | 0.00                    |
| NI*PD          | 2  | 0.67        | 0.34        | 478.49    | <.0001 | 0.00                    |
| IM*DF          | 2  | 0.16        | 0.08        | 113.59    | <.0001 | 0.00                    |
| IM*PD          | 2  | 0.06        | 0.03        | 45.26     | <.0001 | 0.00                    |
| DF*PD          | 1  | 20.43       | 20.43       | 29090.10  | <.0001 | 0.05                    |
| SS*NI*IM       | 8  | 0.07        | 0.01        | 12.30     | <.0001 | 0.00                    |
| SS*NI*DF       | 4  | 0.02        | 0.01        | 8.32      | <.0001 | 0.00                    |
| SS*NI*PD       | 4  | 0.02        | 0.00        | 5.99      | <.0001 | 0.00                    |
| SS*IM*DF       | 4  | 0.01        | 0.00        | 2.76      | 0.03   | 0.00                    |
| SS*IM*PD       | 4  | 0.00        | 0.00        | 1.51      | 0.20   | 0.00                    |
| SS*DF*PD       | 2  | 0.03        | 0.02        | 22.99     | <.0001 | 0.00                    |
| NI*IM*DF       | 4  | 0.02        | 0.00        | 5.75      | 0.00   | 0.00                    |
| NI*IM*PD       | 4  | 0.00        | 0.00        | 1.03      | 0.39   | 0.00                    |
| NI*DF*PD       | 2  | 0.48        | 0.24        | 343.87    | <.0001 | 0.00                    |
| IM*DF*PD       | 2  | 0.02        | 0.01        | 10.97     | <.0001 | 0.00                    |
| SS*NI*IM*DF    | 8  | 0.00        | 0.00        | 0.66      | 0.73   | 0.00                    |
| SS*NI*IM*PD    | 8  | 0.01        | 0.00        | 0.94      | 0.48   | 0.00                    |
| SS*NI*DF*PD    | 4  | 0.01        | 0.00        | 3.49      | 0.01   | 0.00                    |
| SS*IM*DF*PD    | 4  | 0.00        | 0.00        | 0.61      | 0.66   | 0.00                    |
| NI*IM*DF*PD    | 4  | 0.00        | 0.00        | 0.70      | 0.59   | 0.00                    |
| SS*NI*IM*DF*PD | 8  | 0.00        | 0.00        | 0.58      | 0.80   | 0.00                    |

Note: Under "Source," the following abbreviations are used: SS =sample size; NI = number of items; IM = impact condition; DF = DIF magnitude; PD = percent of items with DIF.

Table A3.3. General linear model results for RMSE under the impact-and-DIF model.

| Source                                | DF          | SS       | Mean Square | F Value | Pr > F |  |
|---------------------------------------|-------------|----------|-------------|---------|--------|--|
| Model                                 | 107         | 313.33   | 2.93        | 6926.33 | <.0001 |  |
| Error                                 | 53786       | 22.74    | 0.00        |         |        |  |
| Corrected Total                       | 53893       | 336.07   |             |         |        |  |
| R-Square                              | Coeff Var   | Root MSE | Mean        |         |        |  |
| 0.932336                              | 4.39733     | 0.02     | 0.47        |         |        |  |
| Proportion of Variation Accounted for |             |          |             |         |        |  |
| Eta-Squared                           | 0.93        |          |             |         |        |  |
| $\omega^2$                            | 0.93        |          |             |         |        |  |
| 95% CI                                | (0.93,0.93) |          |             |         |        |  |

  

| Source         | DF | Type III SS | Mean Square | F Value   | Pr > F | Semipartial Eta-Squared |
|----------------|----|-------------|-------------|-----------|--------|-------------------------|
| SS             | 2  | 2.87        | 1.44        | 3398.87   | <.0001 | 0.01                    |
| NI             | 2  | 303.33      | 151.67      | 358736.00 | <.0001 | 0.90                    |
| IM             | 2  | 5.59        | 2.79        | 6605.16   | <.0001 | 0.02                    |
| DF             | 1  | 0.02        | 0.02        | 49.83     | <.0001 | 0.00                    |
| PD             | 1  | 0.66        | 0.66        | 1552.12   | <.0001 | 0.00                    |
| SS*NI          | 4  | 0.37        | 0.09        | 218.47    | <.0001 | 0.00                    |
| SS*IM          | 4  | 0.13        | 0.03        | 76.42     | <.0001 | 0.00                    |
| SS*DF          | 2  | 0.00        | 0.00        | 0.79      | 0.45   | 0.00                    |
| SS*PD          | 2  | 0.15        | 0.08        | 179.73    | <.0001 | 0.00                    |
| NI*IM          | 4  | 0.39        | 0.10        | 231.88    | <.0001 | 0.00                    |
| NI*DF          | 2  | 0.00        | 0.00        | 0.66      | 0.51   | 0.00                    |
| NI*PD          | 2  | 0.12        | 0.06        | 141.49    | <.0001 | 0.00                    |
| IM*DF          | 2  | 0.05        | 0.03        | 64.33     | <.0001 | 0.00                    |
| IM*PD          | 2  | 0.00        | 0.00        | 2.18      | 0.11   | 0.00                    |
| DF*PD          | 1  | 0.00        | 0.00        | 9.22      | 0.00   | 0.00                    |
| SS*NI*IM       | 8  | 0.06        | 0.01        | 18.04     | <.0001 | 0.00                    |
| SS*NI*DF       | 4  | 0.00        | 0.00        | 1.10      | 0.35   | 0.00                    |
| SS*NI*PD       | 4  | 0.05        | 0.01        | 27.58     | <.0001 | 0.00                    |
| SS*IM*DF       | 4  | 0.00        | 0.00        | 1.18      | 0.32   | 0.00                    |
| SS*IM*PD       | 4  | 0.02        | 0.00        | 10.40     | <.0001 | 0.00                    |
| SS*DF*PD       | 2  | 0.00        | 0.00        | 2.03      | 0.13   | 0.00                    |
| NI*IM*DF       | 4  | 0.00        | 0.00        | 2.34      | 0.05   | 0.00                    |
| NI*IM*PD       | 4  | 0.01        | 0.00        | 7.12      | <.0001 | 0.00                    |
| NI*DF*PD       | 2  | 0.00        | 0.00        | 1.59      | 0.20   | 0.00                    |
| IM*DF*PD       | 2  | 0.00        | 0.00        | 2.35      | 0.10   | 0.00                    |
| SS*NI*IM*DF    | 8  | 0.00        | 0.00        | 0.52      | 0.84   | 0.00                    |
| SS*NI*IM*PD    | 8  | 0.01        | 0.00        | 2.94      | 0.00   | 0.00                    |
| SS*NI*DF*PD    | 4  | 0.00        | 0.00        | 2.32      | 0.05   | 0.00                    |
| SS*IM*DF*PD    | 4  | 0.00        | 0.00        | 0.62      | 0.65   | 0.00                    |
| NI*IM*DF*PD    | 4  | 0.00        | 0.00        | 0.72      | 0.58   | 0.00                    |
| SS*NI*IM*DF*PD | 8  | 0.00        | 0.00        | 0.88      | 0.53   | 0.00                    |

Note: Under "Source," the following abbreviations are used: SS =sample size; NI = number of items; IM = impact condition; DF = DIF magnitude; PD = percent of items with DIF.

Table A3.4. Average RMSE across all scoring models and design factors at N = 500.

| 6 Items                            | Unconditional Score |       | Impact-Only Score |       | Impact-and-DIF Score |       |
|------------------------------------|---------------------|-------|-------------------|-------|----------------------|-------|
|                                    | Mean                | SD    | Mean              | SD    | Mean                 | SD    |
| <i>Small Mean/Large Variance</i>   |                     |       |                   |       |                      |       |
| 33% Small DIF                      | 0.651               | 0.035 | 0.589             | 0.051 | 0.585                | 0.043 |
| 66% Small DIF                      | 0.653               | 0.036 | 0.614             | 0.054 | 0.606                | 0.059 |
| 33% Large DIF                      | 0.653               | 0.036 | 0.602             | 0.061 | 0.580                | 0.046 |
| 66% Large DIF                      | 0.667               | 0.038 | 0.733             | 0.113 | 0.606                | 0.066 |
| <i>Medium Mean/Medium Variance</i> |                     |       |                   |       |                      |       |
| 33% Small DIF                      | 0.612               | 0.025 | 0.574             | 0.027 | 0.572                | 0.026 |
| 66% Small DIF                      | 0.612               | 0.025 | 0.602             | 0.031 | 0.591                | 0.033 |
| 33% Large DIF                      | 0.611               | 0.024 | 0.582             | 0.029 | 0.568                | 0.025 |
| 66% Large DIF                      | 0.620               | 0.026 | 0.707             | 0.063 | 0.589                | 0.038 |
| <i>Large Mean/Small Variance</i>   |                     |       |                   |       |                      |       |
| 33% Small DIF                      | 0.601               | 0.020 | 0.547             | 0.022 | 0.545                | 0.022 |
| 66% Small DIF                      | 0.598               | 0.022 | 0.575             | 0.028 | 0.557                | 0.026 |
| 33% Large DIF                      | 0.600               | 0.021 | 0.561             | 0.026 | 0.546                | 0.022 |
| 66% Large DIF                      | 0.604               | 0.021 | 0.694             | 0.062 | 0.562                | 0.028 |
| <br>                               |                     |       |                   |       |                      |       |
| 12 Items                           | Unconditional Score |       | Impact-Only Score |       | Impact-and-DIF Score |       |
|                                    | Mean                | SD    | Mean              | SD    | Mean                 | SD    |
| <i>Small Mean/Large Variance</i>   |                     |       |                   |       |                      |       |
| 33% Small DIF                      | 0.554               | 0.034 | 0.486             | 0.028 | 0.482                | 0.029 |
| 66% Small DIF                      | 0.560               | 0.034 | 0.509             | 0.033 | 0.493                | 0.037 |
| 33% Large DIF                      | 0.562               | 0.037 | 0.504             | 0.036 | 0.481                | 0.031 |
| 66% Large DIF                      | 0.583               | 0.036 | 0.599             | 0.048 | 0.490                | 0.037 |
| <i>Medium Mean/Medium Variance</i> |                     |       |                   |       |                      |       |
| 33% Small DIF                      | 0.504               | 0.024 | 0.476             | 0.022 | 0.472                | 0.022 |
| 66% Small DIF                      | 0.511               | 0.023 | 0.500             | 0.022 | 0.483                | 0.023 |
| 33% Large DIF                      | 0.505               | 0.022 | 0.493             | 0.024 | 0.472                | 0.021 |
| 66% Large DIF                      | 0.529               | 0.025 | 0.587             | 0.036 | 0.481                | 0.024 |
| <i>Large Mean/Small Variance</i>   |                     |       |                   |       |                      |       |
| 33% Small DIF                      | 0.489               | 0.019 | 0.461             | 0.019 | 0.456                | 0.018 |
| 66% Small DIF                      | 0.492               | 0.018 | 0.484             | 0.022 | 0.462                | 0.019 |
| 33% Large DIF                      | 0.488               | 0.018 | 0.484             | 0.023 | 0.456                | 0.018 |
| 66% Large DIF                      | 0.506               | 0.019 | 0.579             | 0.037 | 0.465                | 0.019 |
| <br>                               |                     |       |                   |       |                      |       |
| 24 Items                           | Unconditional Score |       | Impact-Only Score |       | Impact-and-DIF Score |       |
|                                    | Mean                | SD    | Mean              | SD    | Mean                 | SD    |
| <i>Small Mean/Large Variance</i>   |                     |       |                   |       |                      |       |
| 33% Small DIF                      | 0.457               | 0.033 | 0.396             | 0.025 | 0.391                | 0.026 |
| 66% Small DIF                      | 0.466               | 0.032 | 0.419             | 0.024 | 0.396                | 0.027 |
| 33% Large DIF                      | 0.465               | 0.033 | 0.413             | 0.026 | 0.387                | 0.024 |
| 66% Large DIF                      | 0.504               | 0.030 | 0.510             | 0.036 | 0.393                | 0.025 |
| <i>Medium Mean/Medium Variance</i> |                     |       |                   |       |                      |       |
| 33% Small DIF                      | 0.410               | 0.022 | 0.390             | 0.018 | 0.384                | 0.019 |
| 66% Small DIF                      | 0.418               | 0.021 | 0.414             | 0.020 | 0.387                | 0.020 |
| 33% Large DIF                      | 0.413               | 0.022 | 0.408             | 0.021 | 0.381                | 0.019 |
| 66% Large DIF                      | 0.454               | 0.022 | 0.503             | 0.030 | 0.387                | 0.020 |
| <i>Large Mean/Small Variance</i>   |                     |       |                   |       |                      |       |
| 33% Small DIF                      | 0.391               | 0.017 | 0.377             | 0.017 | 0.369                | 0.016 |
| 66% Small DIF                      | 0.401               | 0.017 | 0.405             | 0.020 | 0.377                | 0.017 |
| 33% Large DIF                      | 0.390               | 0.017 | 0.401             | 0.021 | 0.368                | 0.016 |
| 66% Large DIF                      | 0.429               | 0.016 | 0.504             | 0.029 | 0.377                | 0.017 |

Table A3.5. Average RMSE across all scoring models and design factors at N = 1000.

| 6 Items                            | Unconditional Score |        | Impact-Only Score |        | Impact-and-DIF Score |        |
|------------------------------------|---------------------|--------|-------------------|--------|----------------------|--------|
|                                    | Mean                | SD     | Mean              | SD     | Mean                 | SD     |
| <i>Small Mean/Large Variance</i>   |                     |        |                   |        |                      |        |
| 33% Small DIF                      | 0.649               | 0.0258 | 0.569             | 0.0233 | 0.565                | 0.0227 |
| 66% Small DIF                      | 0.654               | 0.0255 | 0.596             | 0.0259 | 0.577                | 0.0279 |
| 33% Large DIF                      | 0.651               | 0.0246 | 0.580             | 0.0269 | 0.563                | 0.0218 |
| 66% Large DIF                      | 0.664               | 0.0259 | 0.696             | 0.0494 | 0.569                | 0.0263 |
| <i>Medium Mean/Medium Variance</i> |                     |        |                   |        |                      |        |
| 33% Small DIF                      | 0.610               | 0.0178 | 0.563             | 0.0172 | 0.560                | 0.0171 |
| 66% Small DIF                      | 0.608               | 0.0175 | 0.588             | 0.0192 | 0.569                | 0.0181 |
| 33% Large DIF                      | 0.608               | 0.0194 | 0.569             | 0.0193 | 0.557                | 0.0177 |
| 66% Large DIF                      | 0.618               | 0.0182 | 0.685             | 0.0360 | 0.567                | 0.0182 |
| <i>Large Mean/Small Variance</i>   |                     |        |                   |        |                      |        |
| 33% Small DIF                      | 0.600               | 0.0147 | 0.537             | 0.0135 | 0.534                | 0.0136 |
| 66% Small DIF                      | 0.596               | 0.0151 | 0.566             | 0.0183 | 0.544                | 0.0158 |
| 33% Large DIF                      | 0.599               | 0.0151 | 0.550             | 0.0163 | 0.536                | 0.0144 |
| 66% Large DIF                      | 0.602               | 0.0158 | 0.673             | 0.0386 | 0.546                | 0.0162 |
| <b>12 Items</b>                    |                     |        |                   |        |                      |        |
|                                    | Unconditional Score |        | Impact-Only Score |        | Impact-and-DIF Score |        |
|                                    | Mean                | SD     | Mean              | SD     | Mean                 | SD     |
| <i>Small Mean/Large Variance</i>   |                     |        |                   |        |                      |        |
| 33% Small DIF                      | 0.552               | 0.0237 | 0.479             | 0.0186 | 0.473                | 0.0189 |
| 66% Small DIF                      | 0.557               | 0.0241 | 0.498             | 0.0200 | 0.475                | 0.0200 |
| 33% Large DIF                      | 0.558               | 0.0257 | 0.493             | 0.0214 | 0.469                | 0.0203 |
| 66% Large DIF                      | 0.581               | 0.0240 | 0.581             | 0.0282 | 0.471                | 0.0196 |
| <i>Medium Mean/Medium Variance</i> |                     |        |                   |        |                      |        |
| 33% Small DIF                      | 0.504               | 0.0171 | 0.471             | 0.0153 | 0.466                | 0.0152 |
| 66% Small DIF                      | 0.509               | 0.0164 | 0.494             | 0.0152 | 0.470                | 0.0152 |
| 33% Large DIF                      | 0.505               | 0.0163 | 0.489             | 0.0156 | 0.465                | 0.0141 |
| 66% Large DIF                      | 0.528               | 0.0173 | 0.576             | 0.0240 | 0.469                | 0.0152 |
| <i>Large Mean/Small Variance</i>   |                     |        |                   |        |                      |        |
| 33% Small DIF                      | 0.486               | 0.0129 | 0.453             | 0.0128 | 0.446                | 0.0120 |
| 66% Small DIF                      | 0.491               | 0.0128 | 0.477             | 0.0135 | 0.453                | 0.0126 |
| 33% Large DIF                      | 0.485               | 0.0130 | 0.476             | 0.0151 | 0.448                | 0.0116 |
| 66% Large DIF                      | 0.505               | 0.0131 | 0.573             | 0.0247 | 0.456                | 0.0128 |
| <b>24 Items</b>                    |                     |        |                   |        |                      |        |
|                                    | Unconditional Score |        | Impact-Only Score |        | Impact-and-DIF Score |        |
|                                    | Mean                | SD     | Mean              | SD     | Mean                 | SD     |
| <i>Small Mean/Large Variance</i>   |                     |        |                   |        |                      |        |
| 33% Small DIF                      | 0.454               | 0.0226 | 0.391             | 0.0169 | 0.384                | 0.0171 |
| 66% Small DIF                      | 0.467               | 0.0235 | 0.415             | 0.0177 | 0.387                | 0.0186 |
| 33% Large DIF                      | 0.465               | 0.0235 | 0.409             | 0.0173 | 0.381                | 0.0177 |
| 66% Large DIF                      | 0.505               | 0.0234 | 0.501             | 0.0229 | 0.384                | 0.0185 |
| <i>Medium Mean/Medium Variance</i> |                     |        |                   |        |                      |        |
| 33% Small DIF                      | 0.406               | 0.0160 | 0.384             | 0.0133 | 0.376                | 0.0135 |
| 66% Small DIF                      | 0.416               | 0.0144 | 0.408             | 0.0129 | 0.378                | 0.0127 |
| 33% Large DIF                      | 0.412               | 0.0158 | 0.403             | 0.0145 | 0.374                | 0.0131 |
| 66% Large DIF                      | 0.451               | 0.0157 | 0.494             | 0.0178 | 0.379                | 0.0135 |
| <i>Large Mean/Small Variance</i>   |                     |        |                   |        |                      |        |
| 33% Small DIF                      | 0.389               | 0.0113 | 0.372             | 0.0108 | 0.364                | 0.0107 |
| 66% Small DIF                      | 0.398               | 0.0111 | 0.400             | 0.0120 | 0.368                | 0.0103 |
| 33% Large DIF                      | 0.391               | 0.0109 | 0.396             | 0.0136 | 0.364                | 0.0107 |
| 66% Large DIF                      | 0.427               | 0.0117 | 0.494             | 0.0205 | 0.369                | 0.0113 |

Table A3.6. Average RMSE across all scoring models and design factors at N = 2000.

| 6 Items                            | Unconditional Score |        | Impact-Only Score |        | Impact-and-DIF Score |        |
|------------------------------------|---------------------|--------|-------------------|--------|----------------------|--------|
|                                    | Mean                | SD     | Mean              | SD     | Mean                 | SD     |
| <i>Small Mean/Large Variance</i>   |                     |        |                   |        |                      |        |
| 33% Small DIF                      | 0.650               | 0.0180 | 0.564             | 0.0158 | 0.560                | 0.0150 |
| 66% Small DIF                      | 0.654               | 0.0189 | 0.587             | 0.0172 | 0.564                | 0.0161 |
| 33% Large DIF                      | 0.649               | 0.0186 | 0.571             | 0.0173 | 0.555                | 0.0153 |
| 66% Large DIF                      | 0.666               | 0.0193 | 0.684             | 0.0294 | 0.559                | 0.0149 |
| <i>Medium Mean/Medium Variance</i> |                     |        |                   |        |                      |        |
| 33% Small DIF                      | 0.609               | 0.0137 | 0.559             | 0.0123 | 0.556                | 0.0124 |
| 66% Small DIF                      | 0.607               | 0.0123 | 0.582             | 0.0130 | 0.559                | 0.0113 |
| 33% Large DIF                      | 0.608               | 0.0125 | 0.565             | 0.0125 | 0.553                | 0.0115 |
| 66% Large DIF                      | 0.619               | 0.0135 | 0.675             | 0.0242 | 0.559                | 0.0119 |
| <i>Large Mean/Small Variance</i>   |                     |        |                   |        |                      |        |
| 33% Small DIF                      | 0.599               | 0.0101 | 0.534             | 0.0093 | 0.531                | 0.0091 |
| 66% Small DIF                      | 0.594               | 0.0098 | 0.559             | 0.0118 | 0.535                | 0.0100 |
| 33% Large DIF                      | 0.598               | 0.0110 | 0.544             | 0.0106 | 0.530                | 0.0098 |
| 66% Large DIF                      | 0.602               | 0.0109 | 0.664             | 0.0247 | 0.538                | 0.0101 |
|                                    |                     |        |                   |        |                      |        |
| 12 Items                           | Unconditional Score |        | Impact-Only Score |        | Impact-and-DIF Score |        |
|                                    | Mean                | SD     | Mean              | SD     | Mean                 | SD     |
| <i>Small Mean/Large Variance</i>   |                     |        |                   |        |                      |        |
| 33% Small DIF                      | 0.552               | 0.0175 | 0.475             | 0.0137 | 0.468                | 0.0136 |
| 66% Small DIF                      | 0.557               | 0.0173 | 0.494             | 0.0130 | 0.468                | 0.0129 |
| 33% Large DIF                      | 0.555               | 0.0179 | 0.488             | 0.0143 | 0.463                | 0.0134 |
| 66% Large DIF                      | 0.581               | 0.0183 | 0.576             | 0.0193 | 0.465                | 0.0137 |
| <i>Medium Mean/Medium Variance</i> |                     |        |                   |        |                      |        |
| 33% Small DIF                      | 0.501               | 0.0116 | 0.468             | 0.0098 | 0.461                | 0.0101 |
| 66% Small DIF                      | 0.508               | 0.0114 | 0.490             | 0.0107 | 0.465                | 0.0103 |
| 33% Large DIF                      | 0.504               | 0.0114 | 0.485             | 0.0107 | 0.460                | 0.0102 |
| 66% Large DIF                      | 0.526               | 0.0112 | 0.571             | 0.0165 | 0.463                | 0.0095 |
| <i>Large Mean/Small Variance</i>   |                     |        |                   |        |                      |        |
| 33% Small DIF                      | 0.486               | 0.0089 | 0.451             | 0.0087 | 0.444                | 0.0082 |
| 66% Small DIF                      | 0.490               | 0.0094 | 0.475             | 0.0102 | 0.448                | 0.0087 |
| 33% Large DIF                      | 0.484               | 0.0089 | 0.473             | 0.0100 | 0.444                | 0.0083 |
| 66% Large DIF                      | 0.505               | 0.0102 | 0.566             | 0.0166 | 0.450                | 0.0091 |
|                                    |                     |        |                   |        |                      |        |
| 24 Items                           | Unconditional Score |        | Impact-Only Score |        | Impact-and-DIF Score |        |
|                                    | Mean                | SD     | Mean              | SD     | Mean                 | SD     |
| <i>Small Mean/Large Variance</i>   |                     |        |                   |        |                      |        |
| 33% Small DIF                      | 0.454               | 0.0157 | 0.389             | 0.0114 | 0.381                | 0.0117 |
| 66% Small DIF                      | 0.467               | 0.0170 | 0.413             | 0.0126 | 0.383                | 0.0131 |
| 33% Large DIF                      | 0.462               | 0.0170 | 0.406             | 0.0129 | 0.378                | 0.0125 |
| 66% Large DIF                      | 0.503               | 0.0160 | 0.495             | 0.0148 | 0.379                | 0.0120 |
| <i>Medium Mean/Medium Variance</i> |                     |        |                   |        |                      |        |
| 33% Small DIF                      | 0.406               | 0.0105 | 0.382             | 0.0091 | 0.374                | 0.0091 |
| 66% Small DIF                      | 0.416               | 0.0108 | 0.405             | 0.0093 | 0.375                | 0.0095 |
| 33% Large DIF                      | 0.411               | 0.0104 | 0.400             | 0.0092 | 0.372                | 0.0090 |
| 66% Large DIF                      | 0.450               | 0.0104 | 0.491             | 0.0129 | 0.375                | 0.0089 |
| <i>Large Mean/Small Variance</i>   |                     |        |                   |        |                      |        |
| 33% Small DIF                      | 0.387               | 0.0080 | 0.370             | 0.0074 | 0.361                | 0.0073 |
| 66% Small DIF                      | 0.397               | 0.0077 | 0.396             | 0.0084 | 0.365                | 0.0075 |
| 33% Large DIF                      | 0.389               | 0.0080 | 0.392             | 0.0092 | 0.361                | 0.0075 |
| 66% Large DIF                      | 0.426               | 0.0088 | 0.490             | 0.0145 | 0.366                | 0.0081 |
